# Supplementary material
Source: PubMed Central journal article supplement (PMC2884087)

## Supplementary Figures

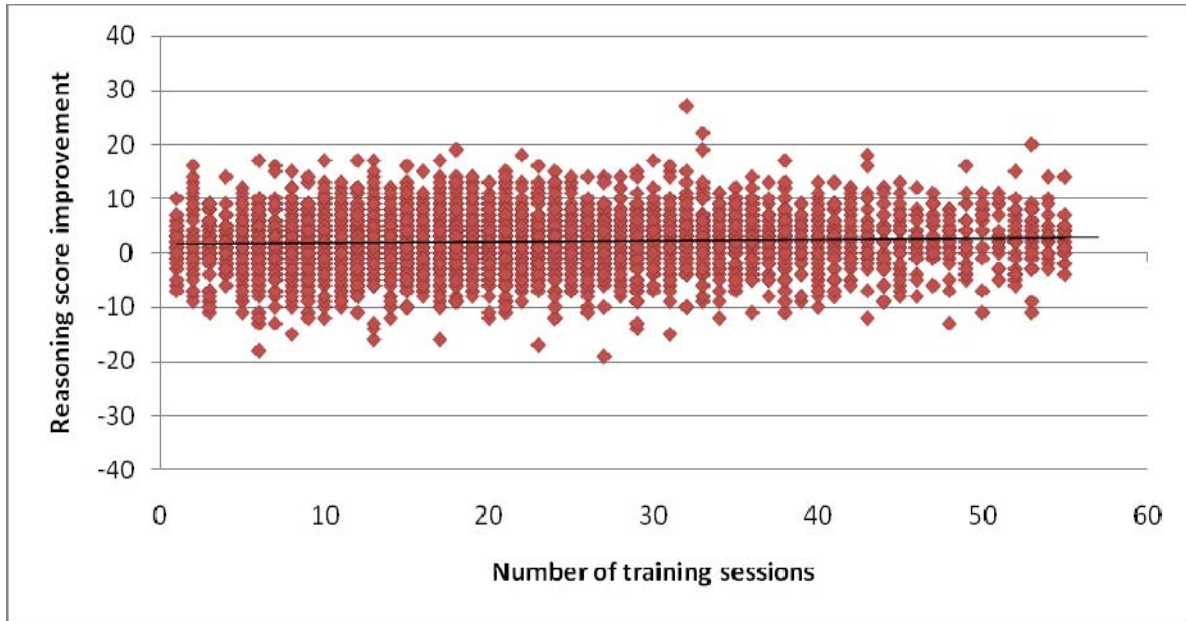

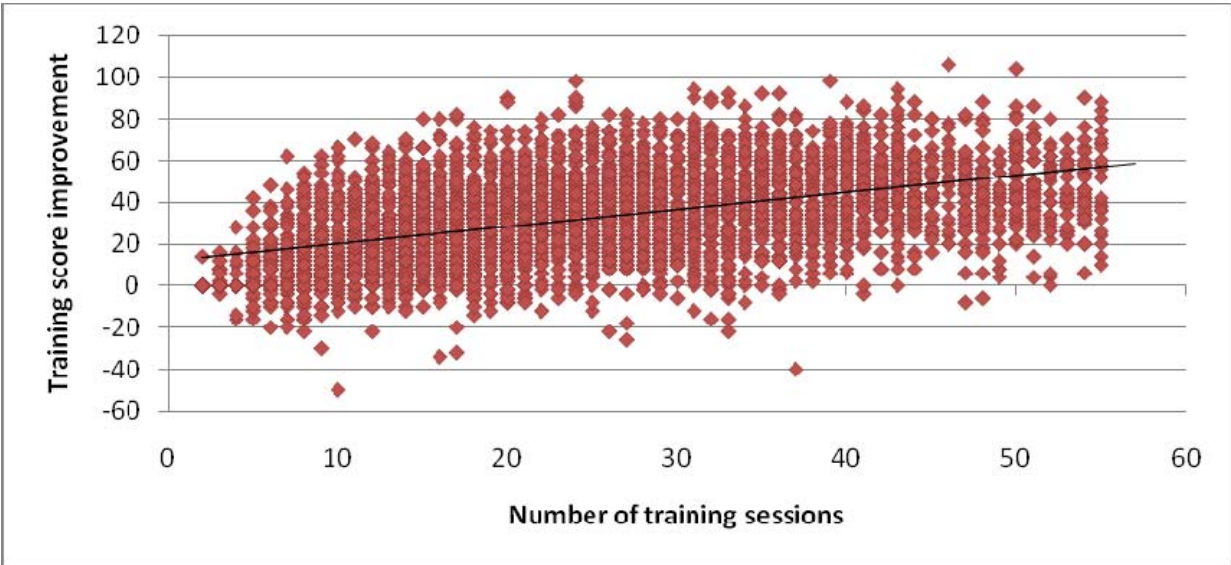

Supplement: NIHMS29457-supplement-4.pdf [file NIHMS29457-supplement-4.pdf]
